# Supplementary material for: Monolayer lipid membrane-forming dissymmetrical bolaamphiphiles derived from alginate oligosaccharides
Source: Royal Society of Chemistry journal article supplement (doi:10.1039/b607368a), 2006-01-01
Supplement: b607368a.pdf [file b607368a.pdf]

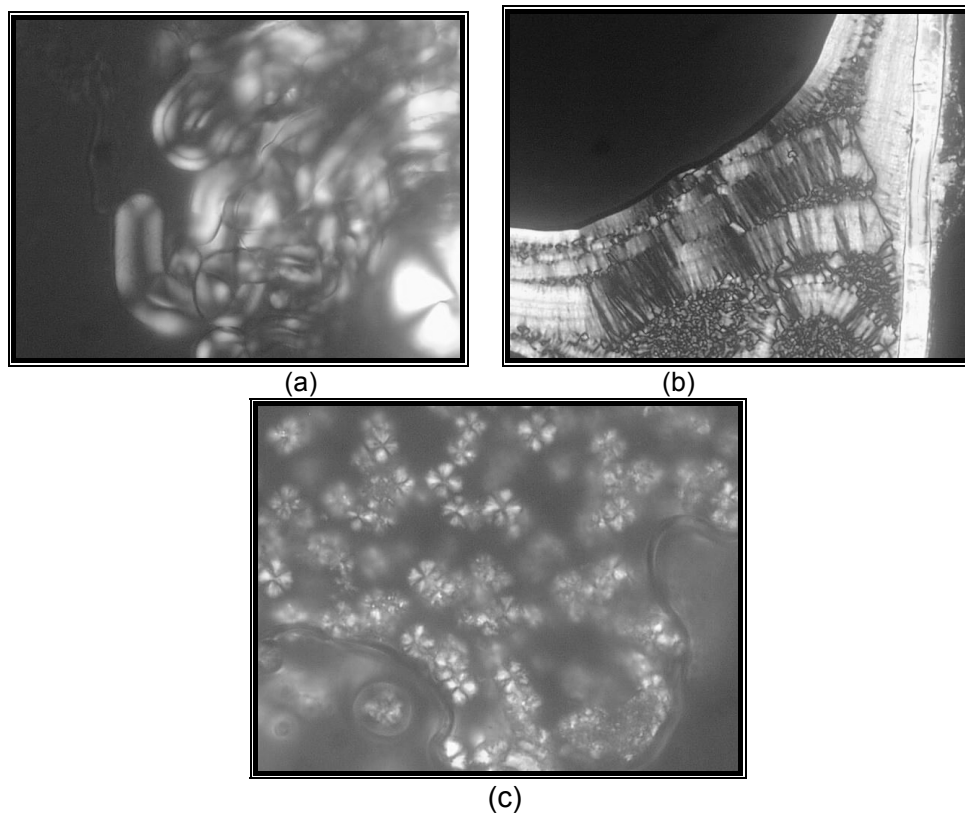

Optical textures of bolaamphiphiles **1a-1b** and **2b** (crossed polarizers). (a) Myelins formed after addition of water, **1a** and **1b** (enlargement 200 x). (b) Contact obtained between compound **1a** and water (enlargement 200 x); top: water; bottom: thermotropic mesophase; centre: lyotropic lamellar mesophase. (c) Maltese crosses, **2b** (enlargement 200 x).
